# Supplementary material for: Integrated Functional, Gene Expression and Genomic Analysis for the Identification of Cancer Targets
Source: PLoS One. 2009 Apr 9;4(4):e5120. doi: 10.1371/journal.pone.0005120 (PMC2663812; doi:10.1371/journal.pone.0005120)
Supplement: Table S1 — Title of dataset: Z scores for 779 siRNA SMARTpools in five cancer cell lines Description of dataset: The sensitivity of five cancer cell lines to siRNA SMARTpools is shown. Analysis was carried out as in the materials and methods. SMARTpools causing significant loss of viability effects (where Z≤−3) are shown in bold. (0.14 MB XLS) [file pone.0005120.s001.xls]

## Sheet: Sheet1
				Z Scores
		GENE	Ac	MCF7	HELA	CAL51	A549	H226
		AAK1	NM_014911	1.00182	0.0136775	-1.27102	-0.467854	-0.690419
		AATK	XM_375495	-0.365756	-1.4274	-0.764949	-0.438531	-0.16037
		ABI1	NM_005470	-1.51044	0.67348	-2.64252	-1.01853	-2.16647
		ABL1	NM_007313	-0.891621	0.39669	0.026411	-0.935711	-0.216578
		ABL2	NM_005158	1.04987	0.160286	0.357265	0.0604227	-1.15677
		ACK1	NM_005781	-0.000568833	-0.20195	-0.0147031	-1.6814	-0.359873
		ACVR1	NM_001105	1.89709	0.524204	0.139969	0.275053	-0.297252
		ACVR1B	NM_004302	0.21243	0.533991	-0.27277	0.337167	0.0263301
		ACVR1C	NM_145259	1.73728	0.351438	-0.373166	0.511132	-0.351171
		ACVR2	NM_001616	1.26307	0.791135	-0.268145	0.794988	0.173608
		ACVR2B	NM_001106	0.531886	1.52213	-0.231634	0.824545	0.807855
		ACVRL1	NM_000020	0.686965	0.797934	-0.643404	0.683547	1.24829
		ADAM9	NM_003816	0.455054	0.752196	0.355411	0.769212	0.0141949
		ADCK1	NM_020421	0.0726124	0.938685	-0.0336185	0.123126	0.422381
		ADCK2	NM_052853	-3.05917	0.744564	0.337135	-0.587386	-1.98621
		ADCK4	NM_024876	0.808789	0.81749	0.176769	-0.0106929	-1.16481
		ADCK5	NM_174922	-0.674427	0.41676	-2.2886	0.665452	0.492037
		ADK	NM_001123	1.85984	0.892703	0.252188	-0.122081	0.99539
		ADRA1A	NM_000680	0.44018	-0.633653	-1.6423	-0.353835	0.478677
		ADRA1B	NM_000679	0.692376	0.999602	0.308485	-0.228266	-0.367703
		ADRB2	NM_000024	-0.62886	-0.288072	-0.575861	-0.616211	-0.330086
		ADRBK1	NM_001619	-2.58903	-1.72681	-0.661445	-0.991483	-0.414305
		ADRBK2	NM_005160	0.531765	-0.556421	0.189231	0.0327625	1.19532
		AGTR2	NM_000686	-0.176832	0.788256	-0.648781	0.569553	0.426272
		AK1	NM_000476	-0.16185	0.0952324	-0.261649	0.598794	0.594316
		AK2	NM_001625	0.560138	1.43427	-0.266455	0.0675733	-0.566952
		AK3	NM_013410	0.62218	1.28401	-0.403044	0.373789	-0.422914
		AK3L1	NM_016282	0.625304	0.707056	0.19993	0.663662	0.765268
		AK5	NM_012093	1.4334	0.852046	0.357899	0.865147	-0.118548
		AK7	NM_152327	0.827469	0.866929	-2.23995	0.567597	0.421132
		AKAP1	NM_003488	-1.14434	0.634787	-2.09162	-0.548569	0.451322
		AKAP11	NM_016248	1.14389	-0.031323	-1.07814	-0.980648	0.280446
		AKAP13	NM_006738	1.59536	1.11059	0.140718	0.81221	0.965427
		AKAP3	NM_006422	-0.743089	0.32605	-0.608574	0.486362	0.35698
		AKAP4	NM_003886	-0.481214	0.388237	0.612483	0.830341	1.42995
		AKAP5	NM_004857	0.412587	0.933005	-0.139313	-0.0314621	0.71839
		AKAP6	NM_004274	-0.478271	-0.382426	-0.42893	-0.777279	-1.10733
		AKAP7	NM_004842	-0.649417	-0.265874	-0.243544	-0.644899	0.761423
		AKAP8	NM_005858	-0.0504007	0.148108	-0.788379	0.00621068	0.575847
		AKT1	NM_005163	-0.577267	-0.998266	-0.5845	-1.1274	0.0460606
		AKT2	NM_001626	-0.918571	-0.644043	-1.09988	0.453974	1.20219
		AKT3	NM_005465	-0.330699	0.0747413	-0.248127	-0.0120705	0.229299
		ALK	NM_004304	0.0699111	0.623141	0.0858391	-0.646442	-1.06398
		ALS2CR2	NM_018571	0.283613	-0.504374	-0.353892	0.758914	-0.359891
		ALS2CR7	NM_139158	-0.471351	0.53798	0.0505646	1.10132	1.26373
		AMHR2	NM_020547	0.963922	0.747742	-1.69724	-0.295374	-0.139254
		ANGPT4	NM_015985	0.431658	0.40493	-1.24641	-0.819944	0.0265066
		ANKK1	NM_178510	0.439625	0.19281	-0.0731571	-0.761035	-0.461459
		ANKRD3	NM_020639	0.51905	0.00746577	0.0578336	0.14502	-0.172211
		APEG1	NM_005876	0.367926	-0.499622	-0.242724	-0.429152	0.491873
		APPL	NM_012096	0.113562	0.272377	0.284137	-0.473193	0.0912254
		ARAF1	NM_001654	-0.489719	0.123054	0.105524	0.918267	0.393258
		ARK5	NM_014840	1.09351	0.396433	0.414598	0.480406	0.225903
		ASK	NM_006716	0.0862685	-0.647014	-0.54406	-1.05135	-0.683376
		ASP	NM_031916	0.140371	0.413204	-0.131149	0.0171017	0.0969125
		ATM	NM_138293	0.864805	-0.287897	-0.20761	0.445306	-0.288844
		ATR	NM_001184	1.44421	1.04027	0.220907	0.0821302	-0.934596
		AURKB	NM_004217	-1.42294	-3.64692	-3.47142	-1.32526	-0.925918
		AURKC	NM_003160	0.289185	0.422837	-0.509539	-1.91379	-0.458407
		AVPR1A	NM_000706	0.888173	0.406272	-0.341153	0.118014	-0.247829
		AVPR1B	NM_000707	-1.0893	-0.279316	-1.57519	-1.3817	-0.742404
		AXL	NM_001699	0.838761	-0.175306	0.374292	0.701467	0.695332
		AZU1	NM_001700	0.316116	0.406034	-0.269331	-1.96503	0.337111
		BCKDK	NM_005881	-1.52009	0.929982	-1.22243	-2.02283	-0.287828
		BCR	NM_004327	-0.88557	0.408485	-0.373065	-0.613595	-0.610738
		BDKRB2	NM_000623	-0.0358889	0.849261	0.515157	-0.11562	-0.118946
		BLK	NM_001715	1.08577	0.430322	0.44685	0.454754	1.28304
		BLNK	NM_013314	-0.781283	0.200388	-0.484597	-2.1358	-2.60542
		BMP2K	NM_017593	0.23342	1.17109	0.359398	-0.0138799	0.669284
		BMPR1A	NM_004329	0.728662	0.159531	0.593877	0.0329141	0.741946
		BMPR1B	NM_001203	0.587571	0.859875	0.881682	-0.618977	1.16703
		BMPR2	NM_001204	0.797605	0.246174	0.509901	0.485474	0.183035
		BMX	NM_001721	1.01122	0.307753	0.311273	0.314159	0.743261
		BRAF	NM_004333	-1.11509	-1.11078	-0.629958	-1.71517	-1.31141
		BRD2	NM_005104	-0.415156	0.152795	0.483941	-0.286139	0.165404
		BRDT	NM_001726	-1.23004	0.237036	0.729227	-0.285537	0.884161
		BTK	NM_000061	-0.509195	0.514358	0.0998577	-0.392483	0.643474
		BUB1	NM_004336	0.259228	-0.774039	-1.10783	0.128595	0.553003
		BUB1B	NM_001211	-3.02504	-4.32665	-1.59916	-1.96204	-1.77622
		C14ORF20	NM_174944	0.293378	0.639115	0.292728	0.35416	0.634541
		C6ORF199	NM_145025	-1.27766	-1.23205	0.183454	-0.988665	-2.60352
		C7ORF16	NM_006658	-0.591583	0.81721	0.354149	-0.518364	0.523539
		C9ORF12	NM_022755	0.0933726	0.393049	-0.0348032	-1.07989	-2.08011
		C9ORF96	XM_291304	-0.542398	-0.195771	-0.0780796	-1.55024	-0.09836
		C9ORF98	NM_152572	0.603683	0.774742	-0.109568	0.150222	0.5707
		CALM3	NM_005184	-1.0133	-2.71365	-1.88137	-1.23311	-3.54291
		CAMK1	NM_003656	-0.270786	0.425493	-2.18996	-0.586919	-0.402784
		CAMK1D	NM_020397	0	0.758115	0.075706	0.9133	0.83923
		CAMK1G	NM_020439	1.16201	1.90645	0.129326	1.45459	1.32927
		CAMK2A	NM_015981	-0.479763	0.407545	0.25888	1.2081	0.518362
		CAMK2B	NM_001220	-1.67498	0.26735	-0.392896	-0.701053	0.780427
		CAMK2D	NM_001221	2.22345	1.17141	0.330192	0.411819	0.682416
		CAMK2G	NM_001222	1.56896	0.68363	0.202535	0.497372	0.333051
		CAMK4	NM_001744	-0.0103261	0.251251	0.246409	-1.03747	-0.486035
		CAMKK1	NM_172207	1.28878	0.894093	0.0510052	-0.543463	0.203877
		CAMKK2	NM_006549	-0.657373	-0.0628545	0.814115	0.287857	1.53877
		CARD10	NM_014550	-1.0079	-0.478017	-1.11705	-1.33574	-0.0928179
		CARD14	NM_024110	0.786962	-0.705935	0.0588272	-1.18066	1.04028
		CARKL	NM_013276	0.801343	-0.515037	-0.724841	-0.897879	0.0207773
		CASK	NM_003688	-1.27843	0.168	0.26468	0.496877	-0.16733
		CCL2	NM_002982	-1.22005	-0.769796	-0.475297	-2.64512	-1.77301
		CCL4	NM_002984	-0.707263	-0.699875	0.255509	-0.909236	-0.213039
		CCRK	NM_012119	0.026296	-0.492717	-0.579296	-2.97373	0.212796
		CD3E	NM_000733	0.369265	-0.839037	0.341939	-0.725236	0.508861
		CD4	NM_000616	0.0103541	-0.33867	0.402789	-0.114802	0.491679
		CD7	NM_006137	0.480085	-0.495781	-0.189232	0.410975	0.0512515
		CDADC1	NM_030911	0.451188	-1.51216	-0.153922	-0.595411	-0.409731
		CDC2	NM_001786	-2.81778	-0.222343	-1.73786	-2.69037	-1.39902
		CDC2L1	NM_001787	-1.31884	-1.26781	-0.94885	-2.25381	-0.569347
		CDC2L2	NM_024011	-1.92175	-4.05298	-4.36376	-4.56253	-3.61991
		CDC2L5	NM_003718	0.535152	0.381864	0.418867	-0.0922695	1.06776
		CDC42BPA	NM_003607	-1.67424	-0.667527	-0.225585	0.0749674	-0.587966
		CDC42BPB	NM_006035	-0.89199	0.21662	0.378328	0.988892	0.316663
		CDC7	NM_003503	-0.0853108	-0.736542	0.193277	-0.390898	0.236309
		CDK10	NM_003674	-0.91751	0.404698	0.370725	-0.0164675	-1.14623
		CDK11	NM_015076	-1.50971	0.433201	0.28001	-0.46211	0.84854
		CDK2	NM_001798	1.30239	1.47235	0.435788	-0.0769064	0.507211
		CDK3	NM_001258	-0.539555	0.0102636	0.205356	-0.00829746	0.37204
		CDK4	NM_000075	-1.75532	1.45338	0.358877	0.8224	0.493125
		CDK5	NM_004935	1.4439	0.512879	0.205587	1.21062	0.292522
		CDK5R1	NM_003885	-1.10676	-0.743532	-0.807933	-1.22181	-0.955913
		CDK5R2	NM_003936	-0.231688	-1.35723	-2.54593	-0.0549203	1.12501
		CDK5RAP1	NM_016082	-1.29673	-1.75978	-1.60361	-1.88659	-1.13911
		CDK5RAP3	NM_025197	-1.2925	-1.89169	-1.82294	-2.48621	-1.48093
		CDK6	NM_001259	-0.468471	-0.581324	0.0715438	-0.540788	-0.365364
		CDK7	NM_001799	-0.475354	0.635004	0.16131	-0.173756	0.54844
		CDK8	NM_001260	0.578039	1.14176	0.628802	0.402464	0.168276
		CDK9	NM_001261	0.907405	-1.79876	-1.35407	-3.76328	-0.179791
		CDKL1	NM_004196	-0.505736	-0.0521084	0.366386	-2.79676	-0.558294
		CDKL2	NM_003948	0.139478	0.403749	0.508408	-0.346187	1.32206
		CDKL3	NM_016508	-0.631571	1.13896	0.627521	0.437033	1.33609
		CDKL5	NM_003159	-0.81757	0.21938	0.0744081	-0.0569983	0.597192
		CDKN1A	NM_000389	-0.241686	0.198905	0.83981	0.730039	0.709183
		CDKN1B	NM_004064	-0.628381	0.179987	-0.236038	0.0844516	0.439722
		CDKN1C	NM_000076	0.953185	-0.97508	-0.3201	-1.19702	0.127816
		CDKN2B	NM_004936	0.975114	0.516328	-0.890944	-0.789249	-0.0544731
		CDKN2C	NM_001262	-0.432519	-0.742391	0.159877	-0.0446106	1.72693
		CDKN2D	NM_001800	-1.24019	-0.374627	-1.05666	-0.94058	-0.582415
		CDKN3	NM_005192	-0.911568	-1.94374	-1.13473	-0.357486	-0.781495
		CERK	NM_022766	-0.594125	0	-0.485015	0.494772	-0.258427
		CHEK1	NM_001274	-2.76615	-2.94054	-2.51201	-2.16178	-0.736849
		CHEK2	NM_007194	1.65108	1.18716	0.321091	1.10566	-0.334551
		CHKA	NM_001277	-0.265677	-0.378671	-0.58604	-1.99576	-3.0756
		CHKB	NM_005198	0.288934	0.506113	0.560661	0.706652	0.732134
		CHRM1	NM_000738	1.19846	1.20292	0.788775	0.894664	1.11177
		CHUK	NM_001278	0.102226	-1.0699	0.25349	0.790018	-0.0666176
		CINP	NM_032630	0.31518	0.153388	-1.33879	0.758613	1.68703
		CIT	NM_007174	-0.92767	-4.08986	-1.20794	-1.23776	-3.54134
		CKB	NM_001823	1.82935	0.877327	0.122096	0.51821	0.681682
		CKM	NM_001824	0.788652	-0.22158	-0.616861	-0.954105	-0.323141
		CKMT1	NM_020990	-0.743546	-1.57217	-0.93177	-1.21452	0.341887
		CKMT2	NM_001825	-0.557983	-0.024007	-0.343095	-0.292007	-0.344218
		CKS1B	NM_001826	-0.746873	0.92186	-0.211913	-0.911888	0.428441
		CKS2	NM_001827	1.13125	1.59132	0.604891	0.674407	0.314829
		CLK1	NM_004071	-0.0645951	1.28922	0.752563	1.29969	0.885309
		CLK2	NM_001291	0.686358	0.844379	0.700713	0.911113	-0.269553
		CLK3	NM_001292	-0.379784	-0.427156	-0.882489	-0.0297438	-0.859626
		CLK4	NM_020666	-0.206488	0.116572	0.200105	-1.00365	0.698608
		CNKSR1	NM_006314	-3.35687	-4.1859	-3.00726	-4.77563	-3.91534
		COASY	NM_025233	-1.55453	0.182545	-0.46123	-1.71898	0.403779
		COL4A3BP	NM_005713	-0.171365	0.953005	0.448114	0.648626	0.337143
		COPB2	NM_004766	-3.95995	-5.34042	-3.81382	-8.26277	-8.4432
		CRK7	NM_016507	-0.129446	0.279874	0.487537	0.0370516	0.372768
		CRKL	NM_005207	0.34914	-0.163855	-0.583706	0.823442	0.829525
		CSF1R	NM_005211	-0.477529	-0.0476013	-0.397028	-1.02069	0.597878
		CSK	NM_004383	1.92038	0.578612	0.0616338	-0.298105	0.326993
		CSNK1A1	NM_001892	-2.05267	0.819932	-0.305456	-0.226244	-0.518753
		CSNK1A1L	NM_145203	0.0239728	-0.0383961	0.171286	0.203547	-0.610148
		CSNK1D	NM_001893	-1.81274	0.00438148	-1.16466	0.0163406	-0.484406
		CSNK1E	NM_001894	-1.55813	1.64177	-0.791126	-1.54832	-0.0228746
		CSNK1G1	NM_022048	-1.06263	-2.80791	-4.11845	-1.98203	-1.06251
		CSNK1G2	NM_001319	0.0986122	1.22308	-0.130535	0.86931	0.693499
		CSNK1G3	NM_004384	0.96948	0.924297	0.22937	0.242013	-0.237642
		CSNK2A1	NM_001895	1.53047	0.638338	-0.12103	1.14556	0.188685
		CSNK2A2	NM_001896	-1.02465	-1.3849	-1.02645	0.527554	-0.749001
		CSNK2B	NM_001320	0.225742	-0.23517	-0.578162	0.815078	-0.525771
		CXCL10	NM_001565	0.877211	0.320467	0.0614065	0.47387	0.542947
		DAPK1	NM_004938	-1.30199	0.446809	-1.17039	-0.174664	0.316471
		DAPK2	NM_014326	1.09384	1.51522	-0.0970152	0.497244	0.138433
		DAPK3	NM_001348	0.361153	0.726834	-0.262148	0.432413	1.11451
		DCAMKL1	NM_004734	0.381968	0.170386	0.307929	0.0936148	-0.771247
		DCK	NM_000788	-0.510987	-2.72929	-0.989198	0.881593	-1.67678
		DDR1	NM_001954	-0.784744	-0.00586705	-0.805569	-0.802689	-1.36214
		DDR2	NM_006182	-0.319159	-0.614412	-0.273474	-1.47041	-0.494904
		DGKA	NM_001345	0.486122	0.168163	-1.55584	-1.27098	0.711099
		DGKB	NM_004080	-0.411589	0.773706	0.42414	0.13768	0.564359
		DGKD	NM_003648	-0.0725301	-0.254196	-0.255436	-0.135154	-1.44277
		DGKE	NM_003647	-0.423405	0.304401	-2.49554	-1.39711	-4.05117
		DGKG	NM_001346	0.998659	0.417457	-0.253901	0.0622364	-0.0591237
		DGKI	NM_004717	0.272585	1.13591	0.47277	0.639648	1.21343
		DGKQ	NM_001347	0.29069	0.930682	-1.66218	-0.640409	-0.299357
		DGKZ	NM_003646	0.551145	-0.181894	-1.62415	0.272169	-0.126779
		DGUOK	NM_001929	0.893286	-1.2024	-0.689502	-0.756162	-0.26805
		DKFZP434C131	XM_044630	0.611128	-0.499079	1.02808	0.994711	1.40848
		DKFZp434C1418	NM_173655	-1.34183	-0.500875	-1.95148	-1.70929	-1.13538
		DKFZP586B1621	NM_015533	-0.0765495	0.187556	0.030097	0.27765	0.295941
		DKFZP761P0423	XM_291277	-0.741403	0.419175	0.175368	0.440006	0.768989
		DLG1	NM_004087	0.213963	0.527181	0.946572	0.449412	-0.201408
		DLG2	NM_001364	-0.870561	0.839138	1.01209	0.54798	0.177343
		DLG3	NM_021120	-0.210339	-0.152571	0.384082	0.644881	-1.20031
		DLG4	NM_001365	-1.3381	0.35491	-0.0190751	-1.54659	-0.0923459
		DMPK	NM_004409	0.794332	-0.679739	-1.39523	-0.379039	0.920057
		DNAJC3	NM_006260	-0.617539	-1.15306	0.18585	-0.0458095	-0.146607
		DOK1	NM_001381	0.196205	-0.0408411	0.714029	0.362814	-1.26375
		DTYMK	NM_012145	0.0388637	-1.10527	0.517757	0.806599	-0.365619
		DUSP1	NM_004417	0.212505	0.0639955	0.00879948	0.24566	0.252595
		DUSP10	NM_007207	0.953038	0.566849	0.318807	0.442325	0.74295
		DUSP2	NM_004418	0.0972744	-0.480192	-0.209525	0.108305	0.501664
		DUSP22	NM_020185	-1.91136	-0.454445	-0.60788	-0.818371	-0.785729
		DUSP4	NM_001394	0.790138	0.593977	0.306338	0.557562	-0.407563
		DUSP5	NM_004419	-1.95789	-0.87841	-0.367797	-0.213262	-0.692991
		DUSP6	NM_001946	-0.666939	-1.36913	0.47371	0.630791	-1.56028
		DUSP7	XM_037430	-0.453782	0.0618828	0.038317	0.00727713	0.695698
		DUSP8	NM_004420	-1.74365	-0.376931	-0.35917	0.0887883	0.0697466
		DYRK1A	NM_001396	0.464887	0.366489	0.722689	1.04089	0.262834
		DYRK1B	NM_004714	1.07864	1.01678	0.617891	1.11581	-0.220517
		DYRK2	NM_003583	1.26966	0.190178	0.439807	0.0042903	1.69917
		DYRK3	NM_003582	1.00532	1.16725	0.613948	-0.0658021	-0.93484
		DYRK4	NM_003845	0.00462196	1.17616	0.669755	-0.232194	1.0098
		EDN2	NM_001956	-1.26601	-0.78597	-0.174031	-0.314407	-1.23848
		EEF2K	NM_013302	-1.74165	-0.967317	-2.09406	-0.696357	-1.54245
		EGFR	NM_005228	0.662785	0.609127	-0.246299	0.381298	-0.180608
		EIF2AK3	NM_004836	0.613952	0.651131	0.648448	0.55811	0.0738885
		EIF2AK4	XM_031612	-0.894423	0.593746	-0.743855	-0.720528	-0.127708
		EKI1	NM_018638	-0.473379	0.0367506	-1.71563	-1.5772	-1.54712
		EPHA1	NM_005232	0.622368	-0.230208	0.0592403	-0.550572	0.116082
		EPHA2	NM_004431	0.95323	0.963984	-0.0100759	0.0235827	-0.901797
		EPHA3	NM_005233	-0.246218	-0.0100654	0.107252	-1.45885	-0.707261
		EPHA4	NM_004438	0.701592	0.582419	-0.0108904	1.00277	0.354385
		EPHA5	NM_004439	0.699963	0.443536	0.598655	0.717697	0.0539054
		EPHA7	NM_004440	-0.116847	0.908522	0.0904505	0.0446965	0.204381
		EPHA8	NM_020526	1.05926	0.784507	-0.0354092	0.992637	-0.075772
		EPHB1	NM_004441	-0.326335	0.237511	0.20276	0.250237	-0.725931
		EPHB2	NM_004442	0.275948	-0.318883	-0.80297	0.839828	-0.259974
		EPHB3	NM_004443	-0.676993	0.0213835	0.0806087	1.14938	-0.166966
		EPHB4	NM_004444	0.440377	1.41652	0.202477	1.36811	0.945937
		EPHB6	NM_004445	-0.064767	0.764684	-0.255471	-0.0311263	-0.316402
		ERBB2	NM_004448	1.31425	1.10663	0.0845098	0.919661	0.679597
		ERBB3	NM_001982	0.28529	1.20047	-0.044372	0.801861	-0.0162861
		ERBB4	NM_005235	-2.01713	0.466687	-0.144086	-0.76625	-0.118732
		ERK8	NM_139021	0.602062	-0.310697	0.56316	0.520747	0.606218
		ERN1	NM_001433	-0.359154	-0.924312	-1.51803	-1.54939	0.261696
		EVI1	NM_005241	0.539851	-0.432464	-0.333301	-0.346805	0.37556
		EXOSC10	NM_002685	-2.06264	-2.18329	-3.09695	-1.03919	-2.08672
		FASTK	NM_006712	-0.833065	-0.636816	-0.25749	-0.0773102	0.216707
		FER	NM_005246	0.0983456	0.987042	0.149866	1.10721	0.424313
		FES	NM_002005	0.362901	0.340138	-0.303281	0.52167	-0.257477
		FGFR1	NM_000604	1.11388	0.749847	0.139158	1.18215	0.112436
		FGFR2	NM_000141	-0.954027	0.55372	-0.307259	-0.759685	-0.213908
		FGFR3	NM_000142	-0.598782	-0.391845	-0.283607	-3.43266	-0.403805
		FGFR4	NM_002011	0.147627	0.31255	-0.122391	-0.152481	0.0627214
		FGR	NM_005248	-0.0303546	0.0359074	-0.91429	-2.54192	-2.45417
		FLJ10074	NM_017988	0.828831	0.513494	0.869632	0.543091	-0.0703564
		FLJ10761	NM_018208	-3.00171	-0.471747	-2.49753	-0.63375	-3.34407
		FLJ10842	NM_018238	-1.05044	-0.307814	0.524603	0.456162	0.83842
		FLJ12476	NM_022784	0.450297	0.560789	0.624336	0.66459	-0.0958887
		FLJ13052	NM_023018	-0.726834	0.321565	0.258873	-1.15482	-0.149112
		FLJ20574	NM_017886	-0.804103	-1.5384	-0.582379	-0.265695	-0.329287
		FLJ23074	NM_025052	-0.335519	-0.938341	0.18277	-0.707689	-0.604398
		FLJ23356	NM_032237	-0.205803	0.271273	0.532734	-0.513184	0.289474
		FLJ25006	NM_144610	-1.27465	-0.289601	0.1943	1.0517	0.261643
		FLJ32685	NM_152534	-0.676587	0.0178348	0.234375	-0.402744	-0.781177
		FLJ34389	NM_152649	0.283028	0.359394	-1.29725	0.289343	-1.30086
		FLJ35107	XM_496631	-0.447501	-1.17852	-2.14288	0.497612	-0.71209
		FLT1	NM_002019	1.164	1.2845	0.262796	0.791995	0.626514
		FLT3	NM_004119	-0.399642	0.0208415	-0.0404586	-1.17824	0.439967
		FLT4	NM_002020	-0.537482	0.317717	-0.0960699	0.070896	-0.18915
		FN3K	NM_022158	-0.593089	0.309917	-0.40996	-0.25024	-1.87747
		FN3KRP	NM_024619	-1.2986	-0.769363	-1.57154	-2.37856	-0.98257
		FRAP1	NM_004958	-1.46674	-2.38369	-2.5943	-2.27862	-2.39023
		FRDA	NM_000144	0.22471	0.766205	-0.402805	-0.21889	0.379439
		FRK	NM_002031	0.291153	0.861839	0.131044	1.21616	0.56791
		FUK	NM_145059	0.065299	0.304604	-0.970694	-1.44748	0.231972
		FYB	NM_001465	-0.694563	-0.103502	0.692368	0.547779	-0.312634
		FYN	NM_002037	0.102375	0.482665	0.244878	0.948112	0.458851
		GAK	NM_005255	-0.163355	0.610774	-0.910865	-1.68526	-0.769985
		GALK1	NM_000154	-1.1269	-1.50491	-3.8816	-0.924097	-1.02533
		GALK2	NM_002044	-0.730902	-0.381314	-0.855344	-3.30249	-0.402552
		GAP43	NM_002045	-0.412	-0.148055	0.323676	0.304105	-0.245981
		GCK	NM_000162	-1.50032	-0.593381	-1.20219	-0.984054	0.469456
		GFRA2	NM_001495	0.677129	1.36802	-0.0859728	-0.0294536	-1.46658
		GK	NM_000167	-0.267253	0.626889	0.462989	0.607985	0.0633514
		GK2	NM_033214	0.998247	0.656371	0.763498	0.579727	0.156746
		GMFB	NM_004124	1.39871	0.882163	0.99407	0.747631	0.660152
		GMFG	NM_004877	-0.595536	0.503672	-0.0283355	-2.01919	-1.19913
		GNE	NM_005476	-0.432464	0.224354	0.696297	-0.694728	0.495149
		GRK1	NM_002929	0.599508	0.182271	0.0574261	0.17937	-0.0943847
		GRK4	NM_005307	-0.907102	-1.08151	-0.533228	0.459066	-1.22383
		GRK5	NM_005308	-0.911411	0.827986	-0.152868	-0.0960794	-0.165732
		GRK6	NM_002082	-1.30748	-0.359413	-1.64259	-0.0151355	0.155599
		GRK7	NM_139209	-0.549106	0.18688	-0.424753	-0.178095	-2.18839
		GSG2	NM_031965	-1.65514	-0.678325	-1.03381	-0.280278	0.443402
		GSK3A	NM_019884	0.60642	-0.575681	-0.674307	-0.156427	-0.972898
		GSK3B	NM_002093	1.08755	0.709606	0.54004	0.783418	1.09346
		GTF2H1	NM_005316	0.303566	-0.62978	-0.0325381	-1.0156	0.702383
		GUCY2C	NM_004963	-0.252639	0.31397	0.137612	0.711709	0.0131018
		GUCY2D	NM_000180	-1.46401	-0.607142	-6.04715	-2.10406	-0.76348
		GUCY2F	NM_001522	0.671032	0.735153	0.827051	0.696853	0.583807
		GUK1	NM_000858	-1.33015	-4.93569	-4.04488	-2.34442	0.406514
		HAK	NM_052947	-0.125295	-0.179594	0.813548	0.328526	0.62673
		HCK	NM_002110	1.35066	0.477183	-0.0205434	-0.453627	0.591387
		HIPK1	NM_152696	1.05709	0.272705	0.403573	0.588365	0.550952
		HIPK2	NM_022740	0.824233	0.727058	0.633349	-0.269165	-0.410819
		HIPK3	NM_005734	1.48623	1.05983	0.58723	0.901283	0.794076
		HIPK4	NM_144685	0.0879163	-1.14737	-0.423934	0.550155	0.721112
		HK1	NM_000188	-0.738907	-0.204346	0.295412	-0.457914	-0.00972139
		HK2	NM_000189	-2.12028	-2.72718	-1.93008	0.00158617	-1.41739
		HK3	NM_002115	0.888983	0.375088	0.696419	0.713154	0.438918
		HRI	NM_014413	-0.432921	-0.358339	0.709539	-0.0438652	-0.0155242
		HSMDPKIN	XM_290516	0.573025	-1.11854	-1.12996	-0.40511	0.869581
		HSPB8	NM_014365	-2.01596	-0.516707	0.301828	-0.681803	0.441644
		HUNK	NM_014586	-2.29806	-1.7627	0.26972	-2.15559	-1.48649
		ICK	NM_014920	0.256305	0.47081	0.361951	0.678568	-0.642011
		IGF1R	NM_000875	1.07254	0.18731	-0.0448459	-0.74462	1.24452
		IHPK1	NM_153273	0.569025	-0.119462	0.668356	0.328352	0.954099
		IHPK2	NM_016291	0.0533695	-0.0591232	0.362412	0.853238	-0.469297
		IHPK3	NM_054111	0.717865	-0.579924	-2.89862	-0.934106	0.334814
		IKBKAP	NM_003640	0.586584	-0.768016	-0.0212345	0.153472	0.613797
		IKBKB	XM_032491	0.265047	-0.366622	0.171651	0.422682	-0.803068
		IKBKE	NM_014002	-1.03274	-1.34107	-1.68069	0.540642	0.486383
		IL2	NM_000586	1.39572	0.0781221	0.909046	0.727964	0.0234078
		ILK	NM_004517	-1.02703	-0.579144	-0.551111	-0.574109	-1.42442
		ILKAP	NM_030768	0.935143	0.818784	0.66331	-0.0232615	0.527047
		IMPK	NM_152230	0.0514074	-0.0640965	-0.0771682	0.380416	0.315334
		INSR	NM_000208	-0.0511163	-0.283263	0.101454	-0.381534	0.0336361
		INSRR	NM_014215	0.56751	-0.125243	-0.172693	0.166429	-0.41691
		IRAK1	NM_001569	-0.657852	-0.814161	-1.27415	-0.0486158	-0.175955
		IRAK2	NM_001570	-1.42274	-0.56746	0	0.62498	0.0483161
		IRAK3	NM_007199	-0.471518	-1.01467	-2.22695	-0.399976	-0.491846
		IRS1	NM_005544	-0.448802	-0.335821	-0.435375	-2.2483	-0.828622
		ITGB1BP1	NM_004763	0.0761129	-0.459255	-0.394672	-0.235241	0.284073
		ITK	NM_005546	0.570603	0.375049	-0.133907	-0.0298143	0.638565
		ITPK1	NM_014216	0.5976	-0.66042	0.0902663	-0.54404	-0.500875
		ITPKA	NM_002220	-1.12202	-0.663037	-0.12805	-1.72232	-2.05185
		ITPKB	NM_002221	-0.0338983	-0.36492	0.0159828	-1.43647	-0.495641
		ITPKC	NM_025194	0.360329	-0.467815	0.0113819	0.694553	0.710254
		JAK1	NM_002227	1.15716	0.979789	0.271797	0.710565	-0.301572
		JAK2	NM_004972	1.46141	1.07728	0.191596	1.22403	0.869425
		JAK3	NM_000215	0.267226	0.542902	-0.0404576	-0.0214247	-0.0429639
		JIK	NM_016281	0.644429	-1.04125	0.316548	-0.121579	0.694204
		KDR	NM_002253	-0.0645334	-0.56409	0.184745	0.273478	-0.419694
		KHK	NM_000221	-0.649415	-0.139286	0.0462276	-0.0547962	-0.859832
		KIAA0999	NM_025164	0.741119	-0.285942	0.328557	-1.42683	-2.41657
		KIAA1361	XM_290796	0.233251	0.0248105	0.368321	-0.562088	0.400823
		KIAA1399	XM_046685	-0.230516	-0.720708	-0.818503	-0.652526	-0.145047
		KIAA1639	XM_290923	1.4974	-0.653423	0.922523	0.791976	-0.610721
		KIAA1765	XM_047355	0.90401	-1.32545	0.588505	0.767152	0.695812
		KIAA1804	NM_032435	0.304551	-0.223123	0.0187636	0.203547	0.742581
		KIAA1811	NM_032430	0.439112	-0.799237	0.476536	-0.659107	-1.06393
		KIF13B	NM_015254	0.654014	-0.0870058	0.967627	0.568585	0.488081
		KIS	NM_144624	0.230802	-0.541956	-0.136194	0.603442	-2.02129
		KIT	NM_000222	0.543508	-0.675347	-0.312189	-0.136573	0.562715
		KSR2	NM_173598	0.541808	-0.653884	-1.24937	-0.0627743	0.080083
		LAK	NM_025144	1.28418	-0.621629	0.362982	-0.440316	-0.0944943
		LATS1	NM_004690	-1.02767	0.601013	0.374845	-0.0982088	0.0992592
		LATS2	NM_014572	-0.0579117	0.806235	0.269133	1.14819	0.559658
		LCK	NM_005356	-0.791887	-0.874871	-0.164253	-0.563507	0.152698
		LCP2	NM_005565	0.328276	-1.04245	0.81429	-0.149298	0.73907
		LIM	NM_006457	0.418686	-0.898071	0.374318	0.180611	1.09597
		LIMK1	NM_002314	-0.0981786	-1.02848	-0.457989	-1.04127	0.394317
		LIMK2	NM_005569	0.375261	-1.44144	0.622112	0.201163	0.36047
		LMTK2	NM_014916	0.763836	-1.27808	0.484593	0.330396	0.569309
		LMTK3	XM_055866	-2.23652	-2.72834	-3.59831	-2.18514	-0.0700139
		LOC115704	NM_145245	0.70628	-0.283861	0.36859	0.106946	0.259153
		LOC149420	NM_152835	0.716636	0.438282	0.470938	0.551873	0.075943
		LOC340371	NM_178564	-0.798732	0.139022	-0.437424	-0.560057	0.712256
		LOC91807	NM_182493	0.637838	0.273857	0.691647	0.901591	-1.21561
		LRRK1	NM_024652	-0.321343	-0.696496	0.376245	0.6259	0.377905
		LTK	NM_002344	0.0746409	-1.59316	-0.842887	0.295813	-0.0285148
		LYK5	NM_153335	-0.618353	0.0866908	0.0329966	-0.0585605	-1.06476
		LYN	NM_002350	-1.42892	-1.75389	-1.03443	-0.00909261	0.252807
		MAGI-3	NM_020965	-1.30763	-0.00991256	-0.113685	-0.746705	-0.129263
		MAK	NM_005906	0.854938	0.124303	-0.292834	0.734257	-0.647422
		MALT1	NM_006785	0.54472	-0.216892	0.695968	0.667133	-0.185405
		MAP2K1	NM_002755	-0.218836	-0.0761103	-1.8371	0.494376	0.29995
		MAP2K1IP1	NM_021970	0.0940774	-0.652985	-0.79967	-0.320963	-2.79826
		MAP2K2	NM_030662	0.820788	-0.364793	0.206124	0.754853	-0.360624
		MAP2K3	NM_002756	-1.92148	-1.47811	-0.841026	-0.342498	-0.0472312
		MAP2K4	NM_003010	1.08461	0.906969	0.460711	0.840136	0.523003
		MAP2K5	NM_002757	0.403658	0.514667	0.381878	0.780953	0.272737
		MAP2K6	NM_002758	-2.34117	-1.68846	0.630815	0.636698	-1.24832
		MAP2K7	NM_145185	0.0829481	-0.945364	-0.489631	-1.04199	0.159441
		MAP3K1	XM_042066	0.721578	0.475777	0.0881138	0.693984	0.609896
		MAP3K10	NM_002446	0.717803	-1.47125	-0.720408	-0.378996	-0.466269
		MAP3K11	NM_002419	-1.17341	-0.937386	-0.421437	-0.15141	0.431544
		MAP3K12	NM_006301	-0.109192	0.215127	-0.198732	-0.873693	-0.657015
		MAP3K13	NM_004721	0.845211	0.187137	0.315149	0.820854	0.14169
		MAP3K14	NM_003954	0.115904	-1.04001	-0.724676	-0.0383926	0
		MAP3K2	NM_006609	-0.318088	-0.117775	0.358229	0.785679	0.962724
		MAP3K3	NM_002401	-8.94336e-05	-0.212883	-0.329376	0.66506	-0.962025
		MAP3K4	NM_005922	0.618555	-0.0534437	0.577831	0.721924	0.0735392
		MAP3K5	NM_005923	0.765657	-0.0134692	0.451905	0.7932	0.340305
		MAP3K6	NM_004672	0.123337	0.646432	0.128958	0.811743	0.398016
		MAP3K7	NM_003188	-0.334613	-0.0609763	0.199234	0.656342	-0.0490345
		MAP3K8	NM_005204	-0.942807	0.628571	-0.332381	0.50689	0.259156
		MAP3K9	XM_027237	-1.22556	-0.982934	-0.363355	-0.188682	-1.62198
		MAP4K1	NM_007181	-1.98241	0.725509	-1.06947	-1.85494	0.595241
		MAP4K2	NM_004579	-0.498473	-0.0316091	-0.248953	-0.478634	-0.801332
		MAP4K3	NM_003618	0.420217	-0.0551673	0.471758	0.591179	-0.575771
		MAP4K4	NM_004834	0.616668	0.999662	0.727567	0.884926	1.55208
		MAP4K5	NM_006575	-0.059178	-0.125785	0.500496	0.228216	0.296081
		MAPK1	NM_002745	-0.937043	-0.308979	-0.225579	-0.722933	-1.17149
		MAPK10	NM_002753	-0.777658	-0.610176	0.552893	0.737153	-0.478926
		MAPK11	NM_002751	-0.770279	0.0645844	-0.765782	-1.36954	-1.57703
		MAPK12	NM_002969	-1.21504	-0.814892	-1.50063	-0.650147	-0.140789
		MAPK13	NM_002754	1.14881	0.862831	0.340852	0.545611	0.510548
		MAPK14	NM_001315	0.384731	-0.835682	-0.0613637	-0.0848512	-0.266101
		MAPK3	NM_002746	-1.66045	-0.316084	-0.239054	0.374096	1.38114
		MAPK4	NM_002747	-0.450459	-0.0170429	0.0173698	-0.241949	-0.503895
		MAPK6	NM_002748	-0.0949786	-0.623081	-0.412222	0.0466157	-0.745444
		MAPK7	NM_002749	0.514501	-0.12157	-0.384831	0.378804	0.98795
		MAPK8	NM_002750	0.753712	0.75153	0.30352	-0.503541	-0.0756802
		MAPK8IP1	NM_005456	-0.796442	-0.828359	0.333921	0.846388	0.954956
		MAPK8IP2	NM_012324	-0.570578	-0.7707	-1.63295	-0.701466	-0.228651
		MAPK8IP3	NM_015133	0.787768	0.0489657	0.372868	0.744971	0.205553
		MAPK9	NM_002752	1.2591	0.992668	0.520714	0.547891	0.722397
		MAPKAPK2	NM_004759	0.710217	-0.242537	0.642565	-0.148673	-1.34754
		MAPKAPK3	NM_004635	0.489904	-0.549717	0.27827	-0.123772	0.416629
		MAPKAPK5	NM_003668	0.643737	0.336184	0.659683	-0.873912	-0.376615
		MARK1	NM_018650	1.07381	-0.772676	0.700538	1.17035	-0.284214
		MARK2	NM_004954	1.29269	-0.531318	0.275983	-1.63404	0.744432
		MARK3	NM_002376	0.542461	-1.20559	-0.457684	-1.76638	-1.28188
		MARK4	NM_031417	-1.34179	-0.162327	-0.197223	-0.818248	-0.106685
		MAST2	NM_015112	-0.150963	-0.891987	-0.0123254	0.1996	-1.97505
		MAST3	XM_038150	-0.0111315	-0.14774	-1.04847	-0.798662	-0.264605
		MASTL	NM_032844	-0.353605	-4.93369	0.238744	-1.14694	-1.00345
		MATK	NM_002378	1.79695	-1.18541	0.347759	-0.102822	0.455301
		MBIP	NM_016586	0.914829	0.0610308	0.846484	0.778707	0.870718
		MELK	NM_014791	0.459759	0.277837	0.108532	-1.47027	0.333217
		MERTK	NM_006343	0.601975	-0.55698	-0.391674	-0.3811	1.09661
		MET	NM_000245	0.844761	0.00139669	0.551511	0.494782	0.873467
		MGC16169	NM_033115	0.159098	-0.291574	0.15209	-0.586443	0.60244
		MGC26597	NM_152700	0.0654146	-0.623154	0.175806	-0.484038	-0.181335
		MGC42105	NM_153361	0.403967	1.06847	0.615943	1.00361	1.28815
		MGC45428	NM_152619	-0.46887	0.730188	0.184964	-2.00208	-0.734635
		MGC4796	NM_032017	-0.604617	0.739885	0.4252	0.198334	1.1864
		MGC5601	NM_025247	-1.46105	-0.441984	-1.90699	-0.873439	-0.151373
		MGC8407	NM_024046	1.05685	0.893186	0.0135605	-0.302649	-0.435954
		MIDORI	NM_020778	-0.458784	-0.158928	-0.177181	-1.04627	-0.773449
		MINK	NM_015716	-1.08744	-1.84255	0.0590254	-1.01689	-1.83278
		MKNK1	NM_003684	1.08195	-0.555694	0.309004	0.411093	-0.248211
		MKNK2	NM_017572	-0.995766	0.585375	0.629058	-0.301404	0.684827
		MOS	NM_005372	0.105227	0.0532402	0.784498	0.0918909	0.666017
		MPP1	NM_002436	0.263159	-0.00532017	-0.471078	-0.87186	0.0884284
		MPP2	NM_005374	-1.47647	-0.334424	-1.31554	-0.289119	0.00545026
		MPP3	NM_001932	0.26823	-0.626919	-0.248378	-0.133723	-0.532612
		MPZL1	NM_003953	2.09966	-0.24923	0.641693	-0.0378564	1.20584
		MRC2	NM_006039	-0.559006	0.529284	-2.77966	-1.87969	-1.84192
		MST1R	NM_002447	-1.8927	-2.64787	-2.24112	-1.41086	-2.11585
		MST4	NM_016542	1.61832	0.845936	0.587936	0.581468	0.799051
		MUSK	NM_005592	-1.11706	-0.93552	-0.812953	-0.662372	-0.432487
		MVD	NM_002461	-1.95002	-0.399296	0.132834	-0.914422	-0.1116
		MVK	NM_000431	0.442322	1.46842	0.0493699	-1.14899	-1.59811
		MYLK	NM_005965	-0.22107	0.0278209	0.30806	-0.813553	0.511048
		MYLK2	NM_033118	-2.39545	-1.13797	-0.550621	-3.15079	-1.56273
		MYO3A	NM_017433	-0.801343	-0.402105	0.190304	0.18228	-1.5812
		MYO3B	NM_138995	0.00606341	-0.112205	0.268333	0.486888	0.682173
		NAGK	NM_017567	-1.25178	-1.25706	-0.497179	-4.52574	-3.08196
		NBEA	NM_015678	-0.191834	0.214455	1.06432	0.44954	-0.747644
		NEK1	XM_291107	-1.03962	-0.291185	-0.123217	-0.808271	-1.03063
		NEK11	NM_024800	-0.347827	-1.10096	0.137102	-0.586902	-1.22908
		NEK2	NM_002497	-0.380071	-0.844051	0.259031	-0.535672	0.161279
		NEK3	NM_002498	-0.793619	-0.659484	-0.604204	-0.893291	-2.45772
		NEK4	NM_003157	-0.382881	-0.303033	0.0387871	-0.0752846	0.323628
		NEK6	NM_014397	-0.587607	0.00656732	0.273627	0.977828	1.6767
		NEK7	NM_133494	-0.406594	-0.693078	-1.49209	0.767503	0.621117
		NEK8	NM_178170	-0.938496	-0.839473	-0.303854	-1.57743	1.26749
		NEK9	NM_033116	-0.849645	0.326336	-0.0435088	-0.608861	1.10994
		NLK	NM_016231	-1.38653	-0.261004	-1.45366	-0.237406	-0.133513
		NME1	NM_000269	2.06585	1.49535	0.0143928	0.186532	-0.668265
		NME2	NM_002512	0.818095	-0.0219181	0.121668	0.0971726	0.653983
		NME3	NM_002513	-0.705836	-1.71058	-3.20464	-1.07399	-0.194649
		NME4	NM_005009	1.25087	-1.36847	0.488345	0.160007	1.03048
		NME5	NM_003551	0.714093	0.241619	-1.52027	0.714923	1.07066
		NME6	NM_005793	-0.925256	0.157093	-0.990438	-1.6565	0.969438
		NME7	NM_013330	-0.0760611	0.0564836	0.320339	0.232986	0.73176
		NPR1	NM_000906	-0.949765	-0.444072	-0.845586	-0.342822	-0.30162
		NPR2	NM_000907	0.411555	0.304787	0.0694503	0.855931	0.254361
		NRBP	NM_013392	0.393522	-0.0387163	-0.972395	0.945295	-1.26553
		NRG3	XM_166086	1.32858	0.119199	0.338082	0.489439	-0.246071
		NTRK1	NM_002529	-0.381918	-0.804816	-0.0887905	-0.655112	0.167108
		NTRK2	NM_006180	1.26082	-0.190527	0.399707	0.384174	0.636992
		NTRK3	NM_002530	0.572859	0.0363734	0.366875	0.411601	0.76165
		NYD-SP25	NM_033516	0.277633	-0.375773	0.0126418	0.197206	1.01689
		OSR1	NM_005109	-1.95604	0.219644	0.296864	-0.231305	-0.733296
		P15RS	NM_018170	1.70393	-0.663971	-0.149277	1.11688	0.671036
		PACE-1	NM_020423	1.59656	-1.01665	-1.08209	0.378593	0.075445
		PACSIN1	NM_020804	0.215134	-0.72152	0.300375	-0.794225	-0.584286
		PAG	NM_018440	1.06289	-1.05067	-0.111169	-0.603618	-1.01022
		PAK1	NM_002576	0.395594	-1.58397	-0.0635403	0	-0.0976258
		PAK2	NM_002577	0.534369	0.599576	-0.388761	-0.656462	-0.229717
		PAK3	NM_002578	1.22322	1.15255	0.48419	0.471552	-0.53084
		PAK4	NM_005884	0.978145	0.776375	0.0377296	0.800566	-1.44384
		PAK6	NM_020168	-0.661733	0.464038	0.194148	-0.431864	-0.839059
		PAK7	NM_020341	1.12764	0.909989	-0.106771	0.112889	-1.70039
		PANK1	NM_138316	0.471625	-0.70088	-0.279422	0.775008	0.755742
		PANK3	NM_024594	1.01398	-0.441713	1.00934	0.175475	0.0781337
		PANK4	NM_018216	-1.27327	-3.24135	-1.89261	-2.79458	-2.414
		PAPSS1	NM_005443	-0.116113	-0.759611	0.202293	0.71774	-0.0814613
		PAPSS2	NM_004670	1.06872	-1.52292	0.371551	1.18961	0.291675
		PASK	NM_015148	-0.262037	0.0362983	-0.365555	0.322363	-1.53407
		PCK1	NM_002591	-0.836683	-2.26404	-0.26429	0.0860876	0.0198647
		PCK2	NM_004563	1.42683	-1.71808	-0.168393	-1.41904	0.0766152
		PCTK1	NM_006201	0.246039	0.485737	0.247113	0.283833	1.04669
		PCTK2	NM_002595	0.0535712	0.116783	0.227404	-0.155243	0.439996
		PCTK3	NM_002596	-1.0285	-2.74015	-2.01125	-0.425986	1.38217
		PDGFRA	NM_006206	-0.979725	-1.31323	0.291136	-0.656083	-0.089163
		PDGFRB	NM_002609	-0.469376	-2.99706	-0.449838	-1.19333	-1.67214
		PDK1	NM_002610	0.581622	-1.67579	0.350088	0.51595	0.73925
		PDK2	NM_002611	-1.09804	-1.48178	-0.155388	-0.176429	-0.768687
		PDK3	NM_005391	0.227059	-0.918472	0.580447	0.572127	-0.866626
		PDK4	NM_002612	0.751515	-0.558264	-0.000819311	-0.452357	-1.95775
		PDPK1	NM_002613	-1.84518	-1.3001	0.149477	0.0299579	-0.287277
		PDXK	NM_003681	0.804084	-0.887316	-0.622892	0.972371	0.297926
		PFKFB1	NM_002625	-0.94521	-2.4118	-4.12957	-0.674974	-0.748145
		PFKFB2	NM_006212	0.822005	-0.659118	-0.280892	-0.286419	-0.39832
		PFKFB3	NM_004566	-0.460588	-0.972991	-2.15348	-0.775115	-2.79428
		PFKFB4	NM_004567	0.951365	-1.59022	-0.147008	0.850407	1.00376
		PFKL	NM_002626	-1.0774	-1.18109	-0.232911	0.0678951	0.0323933
		PFKM	NM_000289	0.427215	-0.965375	-0.187167	-0.286175	-0.62161
		PFKP	NM_002627	0.464369	0.573537	-0.252896	-0.976237	-0.50727
		PFTK1	NM_012395	-0.659025	-0.587295	-0.688479	0.367472	0.197831
		PGK1	NM_000291	0.908881	1.39415	0.0612529	0.166816	-0.477423
		PGK2	NM_138733	-0.231247	1.00456	0.23587	0.577855	-0.723061
		PHKA1	NM_002637	1.43818	1.92357	0.186129	0.450037	-0.143405
		PHKA2	NM_000292	0.27313	0.535519	0.488943	0.53745	-0.300238
		PHKG1	NM_006213	0.581488	0.371339	-0.819879	0.887743	0.684554
		PHKG2	NM_000294	0.782246	0.904291	0.447282	-1.18984	0.835083
		PI4K2B	NM_018323	0.2005	0.0658835	-2.14723	0.0619187	-1.38369
		PI4KII	NM_018425	1.24466	0.618359	-0.988522	0.159294	-0.418618
		PIK3C2A	NM_002645	-2.98915	-1.13198	-3.29915	-0.691465	-1.9943
		PIK3C2B	NM_002646	0.163824	0.857149	-0.69915	-1.77124	-0.965423
		PIK3C2G	NM_004570	-1.19098	0.34318	0.342384	-0.173443	0.84252
		PIK3CA	NM_006218	-3.80223	0.538853	-0.220124	-0.725233	-0.602737
		PIK3CB	NM_006219	0.972095	0.0381543	-0.0661032	-0.149547	-0.084797
		PIK3CG	NM_002649	0.0110894	-0.263098	0.310735	-1.26026	-0.542599
		PIK3R1	NM_181504	0.644403	0.51137	0.174036	0.0730672	0.515111
		PIK3R2	NM_005027	0.18048	-0.40539	-0.129682	0.061861	0.549341
		PIK3R3	NM_003629	1.11545	0.319674	0.236449	0.281775	0.417625
		PIK3R4	NM_014602	-1.36786	-0.251381	-1.39187	0.06734	0.141781
		PIK4CA	NM_002650	-1.02213	-0.492086	-1.13361	-0.555797	-1.00886
		PIK4CB	NM_002651	-0.112225	0.612774	-0.654493	-0.359988	0.497343
		PIM1	NM_002648	0.441004	0.13503	0.309927	0.0771468	0.50481
		PIM2	NM_006875	0.00319655	-1.28485	0.13773	-1.23839	-0.898436
		PINK1	NM_032409	0.282007	-0.0956451	-0.712095	-1.00935	0.158881
		PIP5K1A	NM_003557	-0.64258	-0.0108383	-1.86738	-1.26323	-2.55385
		PIP5K2A	NM_005028	1.19775	1.06826	1.07934	-0.00574515	0.190227
		PIP5K2B	NM_003559	-0.491072	-0.0993778	-2.1191	-0.643874	-0.846971
		PIP5K2C	NM_024779	0.882814	0.677665	0.639482	0.146343	0.133659
		PIP5KL1	NM_173492	0.313925	-0.439887	0.0473191	-0.446958	-0.83687
		PITPNM3	NM_031220	-1.56739	-2.0272	-1.5783	-1.56799	-1.01793
		PKIA	NM_006823	0.0131569	0.0931608	0.57862	0.227429	-1.78198
		PKIB	NM_032471	-0.232049	0.509002	-0.282566	-0.763397	0.318641
		PKLR	NM_000298	0.741536	0.812531	-0.149323	-0.00743272	0.473356
		PKM2	NM_002654	-0.208663	-1.37438	-2.5381	-0.668872	-1.09837
		PKMYT1	NM_004203	-0.553366	0.0130702	-2.08176	0.215786	0.589766
		PKN3	NM_013355	-0.279489	-0.981609	-4.94541	0.108825	-0.132197
		PLK1	NM_005030	-5.22839	-5.72464	-8.02686	-5.83274	-4.17536
		PLK2	NM_006622	1.80303	0.784721	-0.195211	0.297363	-0.486398
		PLK3	NM_004073	-0.160645	0.694485	-0.901801	-1.62164	0.818074
		PLK4	NM_014264	-1.68432	0.0385635	-2.92462	-1.39775	-1.47411
		PMVK	NM_006556	-0.840861	-0.593503	-0.490234	-3.73883	-2.27833
		PNKP	NM_007254	-0.501144	-0.0171758	-1.77916	-1.46733	0.795011
		PPP1R1B	NM_032192	1.18589	0.225233	0.430031	0.152505	-0.514818
		PPP2CA	NM_002715	0.0649394	-1.65741	-0.530834	0.707894	-0.142645
		PPP2CB	NM_004156	-0.679287	0.625624	0.0320136	0.128157	-0.654338
		PPP4C	NM_002720	-0.6541	0.0473206	0.491335	0.294614	0.668273
		PRKAA1	NM_006251	-0.175693	0.885395	0.405784	0.436859	1.40707
		PRKAA2	NM_006252	0.607108	0.698095	0.442214	0.913126	1.59545
		PRKACA	NM_002730	-1.67195	0.5677	-0.263165	0.717929	0.251478
		PRKACB	NM_002731	0.146553	1.15914	-0.067155	0.624071	0.99941
		PRKACG	NM_002732	-1.42294	0.173718	-0.664987	1.33594	-0.539975
		PRKAG1	NM_002733	1.78206	0.419072	0.955442	0.226088	1.15161
		PRKAG3	NM_017431	-2.0352	-3.11016	-4.43397	-3.26994	-0.0937288
		PRKAR1A	NM_002734	0.275904	0.49017	0.912386	0.340769	0.0460545
		PRKAR2A	NM_004157	0.759998	0.573676	-0.0206721	0.33131	-0.0266666
		PRKAR2B	NM_002736	-1.45764	-1.16822	-1.35317	-0.413999	-1.14593
		PRKCA	NM_002737	-0.234746	-0.0936547	-0.0584647	0.337763	0.286413
		PRKCABP	NM_012407	0.834855	0.146245	0.485909	0.275904	0.186279
		PRKCB1	NM_002738	-0.381927	0.0244108	-0.861604	0.190493	-0.493455
		PRKCD	NM_006254	-0.577353	-0.134186	0.0565727	0.000111338	0.670465
		PRKCE	NM_005400	1.27797	-0.279637	-0.242413	0.151397	-1.28509
		PRKCG	NM_002739	1.69859	0.477407	0.29825	1.16928	0.195668
		PRKCH	NM_006255	-1.54737	-0.862573	-0.522436	0.285423	-0.45024
		PRKCI	NM_002740	0.722455	-0.398162	-0.904556	0.819558	0.649488
		PRKCL1	NM_002741	0.598836	0.824462	0.045981	0.423619	0.00565981
		PRKCL2	NM_006256	0.607937	-1.14327	-1.67974	-1.70895	-1.27459
		PRKCM	NM_002742	0.852573	0.50144	0.710535	0.501493	-0.424148
		PRKCN	NM_005813	0.545885	-0.114818	0.383135	-0.206148	0.850394
		PRKCQ	NM_006257	0.189549	0.645711	-0.0287588	0.595132	-1.61876
		PRKCSH	NM_002743	-1.09282	0.763339	0.624361	-0.0287063	-0.397738
		PRKCZ	NM_002744	-0.174718	0.610797	-0.335802	0.753079	-1.41222
		PRKD2	NM_016457	0.512293	0.316721	-0.0368311	0.513568	0.445728
		PRKDC	NM_006904	0.244353	-0.837334	-0.0932698	0.226791	-0.472905
		PRKG1	NM_006258	0.304378	0.465189	-0.28232	0.176534	-0.77331
		PRKG2	NM_006259	-1.52645	0.0380643	-0.438129	0.00376417	0.204958
		PRKR	NM_002759	0.627706	-0.502572	1.10597	0.502174	0.485558
		PRKRA	NM_003690	-1.18141	-0.000741909	-0.36008	-0.235936	0.451207
		PRKWNK1	NM_018979	-0.675284	-1.67348	0.206681	-0.44384	-0.168109
		PRKWNK2	NM_006648	0.399081	0.271126	-0.348697	0.208882	0.794183
		PRKWNK3	NM_020922	0.916819	-0.081109	0.350352	0.527674	0.560795
		PRKWNK4	NM_032387	1.22007	-0.294349	0.303608	-0.591842	-0.252084
		PRKX	NM_005044	0.0494669	0.885887	0.0287819	0.0146175	-0.690281
		PRKY	NM_002760	2.18322	0.432103	0.0962518	0.840347	-1.43958
		PRPF4B	NM_003913	-0.787046	-1.36661	-1.46425	-0.89746	-0.694645
		PRPS1	NM_002764	-0.0671416	0.194401	-0.433786	-0.174925	0.612196
		PRPS1L1	NM_175886	0.31162	0.225758	0.257778	0.132159	-0.101886
		PRPS2	NM_002765	0.121446	0.786806	0.903871	0.403507	1.00107
		PRPSAP1	NM_002766	-1.35537	-0.251625	-0.591077	0.574172	-1.14957
		PRPSAP2	NM_002767	-1.50705	-1.15498	-0.491736	0.241508	-0.357851
		PSKH1	NM_006742	0.430829	0.760363	0.240026	0.445123	1.25976
		PSKH2	NM_033126	-0.296346	0.19994	0.129799	-0.345836	-0.167783
		PTK2	NM_005607	-0.73687	-1.72781	-0.869908	-0.850058	-1.50091
		PTK2B	NM_004103	-0.631017	-0.543922	-0.259644	0.179057	-0.609154
		PTK6	NM_005975	0.127989	-0.653178	0.272051	0.0168389	-0.837671
		PTK7	NM_002821	0.171912	-2.3945	-1.80319	0.610845	-0.475133
		PTK9	NM_002822	1.80331	0.945072	0.379968	0.680925	0.838112
		PTK9L	NM_007284	0.339465	-0.698625	-0.519049	-0.820754	-0.189064
		PTPN5	NM_032781	0.67017	0.160725	0.177629	0.263637	0.264801
		PTPRG	NM_002841	0.684391	1.28659	0.872628	0.609823	0.0993591
		PTPRJ	NM_002843	-2.01756	-1.98134	0.58741	0.425293	0.598954
		PTPRR	NM_002849	-1.64577	-0.247186	-1.05253	-1.15957	-1.29203
		PTPRT	NM_007050	1.5509	0.732951	0.373455	0.436534	0.827552
		PXK	NM_017771	0.210958	-0.715012	0.67401	0.248334	0.620331
		PYCS	NM_002860	-0.412222	-0.0187242	0.00935825	-0.148003	0.795181
		RAC1	NM_018890	-0.205585	-0.101242	-0.8207	-0.097297	-0.606495
		RAF1	NM_002880	0.521081	-0.161584	0.0852186	0.00494302	0.447063
		RAGE	NM_014226	-0.767013	0.0725573	0.337799	0.77607	1.10516
		RAPGEF3	NM_006105	-1.18454	-0.374953	-2.18694	-2.22584	-1.38338
		RAPGEF4	NM_007023	-0.098618	-0.242752	0.215114	-0.266818	0.595168
		RASGRF2	NM_006909	-0.141885	-1.2906	-2.84874	-2.18582	-1.14283
		RBKS	NM_022128	0.585365	0.234668	0.602769	0.412204	0.87148
		RET	NM_000323	0.393537	-1.61118	-1.54456	-0.739728	-2.00749
		RFK	NM_018339	-0.321275	0.638935	0.786275	0.792671	-0.243869
		RFP	NM_006510	-1.52268	-1.21751	-1.19105	-0.409406	-0.826966
		RIOK1	NM_031480	-1.48752	-0.879043	-1.46308	-2.23287	-1.036
		RIOK3	NM_003831	-1.14001	-1.56482	0.664299	0.428055	-0.0306329
		RIPK1	NM_003804	1.04378	0.61465	0.406946	0.316197	-0.506107
		RIPK2	NM_003821	0.447915	-0.0818083	-0.000697948	0.558816	0.460283
		RIPK3	NM_006871	1.6523	-0.765634	-0.671722	0.350428	-0.891386
		RNASEL	NM_021133	0.0698332	0.710161	0.805605	0.446139	1.14699
		ROCK1	NM_005406	0.81606	1.15603	0.232128	0.954047	1.60154
		ROCK2	NM_004850	-0.59822	1.26959	-0.0924077	0.749893	0.488348
		ROR1	NM_005012	-0.848249	-0.518333	0.143541	-0.698728	0.2865
		ROR2	NM_004560	-0.468112	-0.348504	-0.78816	0.307853	-0.56896
		ROS1	NM_002944	-1.74272	-1.15659	-0.271398	-0.439588	-2.04686
		RP2	NM_006915	0.615062	-0.219796	-0.149526	0.471503	0.815342
		RPS6KA1	NM_002953	-0.18665	0.136754	-0.65878	-0.978993	0.0216656
		RPS6KA2	NM_021135	-3.14249	-2.65982	-1.89869	-3.73953	-2.88625
		RPS6KA3	NM_004586	1.11323	0.299159	0.233446	0.16271	-0.445866
		RPS6KA4	NM_003942	-1.41864	1.04044	-1.49712	0.333787	-0.680716
		RPS6KA5	NM_004755	-0.231451	-0.436683	0.0683846	0.53542	0.741921
		RPS6KA6	NM_014496	-1.0491	0.801822	0.355875	1.27795	-0.056655
		RPS6KB1	NM_003161	-0.74818	0.877369	0.366659	-0.247408	-0.599248
		RPS6KB2	NM_003952	0.0399815	0.787786	0.0652031	1.02752	0.552932
		RPS6KC1	NM_012424	-1.06213	0.773101	0.360742	1.10355	0.770066
		RPS6KL1	NM_031464	-0.804166	-0.0635241	-0.99363	-1.92754	-1.25728
		RYK	NM_002958	0.247827	-0.132789	0.502425	0.44289	1.14463
		SAST	NM_014975	-1.27523	0.413294	-0.175985	0.360169	0.252452
		SCAP1	NM_003726	0.168555	-0.301802	-0.0439448	-0.0372601	-2.33067
		SCYL1	NM_020680	0.595616	0.569716	0.585873	0.367432	0.443617
		SEPHS1	NM_012247	-1.01139	-0.591608	-1.39557	-0.200864	-0.130901
		SEPHS2	NM_012248	-0.0489923	0.56287	0.127947	0.268676	-0.4688
		SGK	NM_005627	0.126023	1.02754	0.3412	1.44331	1.627
		SGK2	NM_016276	-1.21794	0.407674	-0.579473	0.23675	-0.120026
		SGKL	NM_013257	-0.428109	0.879623	-0.0636845	1.25036	-0.142106
		SHC1	NM_003029	0.622255	0.0334239	0.731501	0.057252	0.0921502
		SIK2	NM_015191	-0.635521	0.91014	0.229085	-0.968469	-0.858394
		SLK	NM_014720	-1.58012	0.424465	0.0282124	0.936156	0.240312
		SMAD7	NM_005904	-0.0667846	0.150988	0.746123	0.574171	0.563657
		SMG1	NM_014006	-1.76838	-0.652207	-1.72695	-0.583849	-0.115931
		SNARK	NM_030952	0.371088	-0.407232	0.127747	0.26647	-0.938135
		SNF1LK	NM_173354	1.04517	0.517368	0.327258	0.853213	1.4396
		SNRK	NM_017719	0.0671872	0.24046	0.370595	1.26868	-0.0367186
		SOCS1	NM_003745	-0.326125	0.38898	0.0522069	-0.284828	0.682681
		SOCS5	NM_014011	-0.218742	0.28624	0.276229	0.461659	0.672572
		SPA17	NM_017425	0.293444	-1.03682	-0.634289	-0.276448	0.0343106
		SPEC2	NM_020240	0.724314	-0.728235	-0.416425	-0.106718	1.09163
		SPHK1	NM_021972	0.454959	0.515822	-0.933347	-0.408631	-2.29479
		SPHK2	NM_020126	-0.349911	0.0534674	0.774149	0.576638	1.51396
		SQSTM1	NM_003900	-0.229069	0.191642	-1.60577	-0.624562	-2.22848
		SRC	NM_005417	-0.362584	-1.12642	-0.418325	-0.269314	-0.791062
		SRMS	NM_080823	-1.31449	-0.391446	-0.917671	-1.28649	-0.732358
		SRPK1	NM_003137	0.0385584	0.189363	0.0452673	0.608104	0.256966
		SRPK2	NM_182691	0.148138	0.240824	0.0489823	0.602625	0.104821
		SSTK	NM_032037	-0.595747	0.683801	0.216591	-0.672331	-1.11478
		STK10	NM_005990	1.23184	0.531263	0.230932	0.13127	-0.155836
		STK11	NM_000455	-1.41053	1.01875	0.600797	-0.664618	-0.889016
		STK16	NM_003691	-0.520489	1.07646	0.968747	-0.788868	0.284379
		STK17A	NM_004760	-0.328466	0.728675	0.679577	0.202725	0.363835
		STK17B	NM_004226	0.890064	-0.0563392	0.0842077	0.288006	-0.345552
		STK19	NM_004197	0.145073	0.816422	-0.15496	-0.687596	-0.42958
		STK22B	NM_053006	-1.30247	-0.463027	-0.362333	-1.22016	-1.11604
		STK22C	NM_052841	0.858872	-0.665813	-0.353855	-0.224588	-0.443799
		STK22D	NM_032028	0.322684	0.900568	0.288193	0.344186	0.81593
		STK23	NM_014370	0.126416	-0.667861	0.248654	0.461451	0.523687
		STK24	NM_003576	0.190081	0.568195	-0.513452	-0.368427	-1.48076
		STK25	NM_006374	-1.49506	0.104608	-0.00592654	-0.0828271	-0.0351698
		STK29	NM_003957	0.883033	1.01032	0.544569	0.333949	0.0864295
		STK3	NM_006281	-0.0964544	0.599743	0.147017	0.378822	-0.538404
		STK31	NM_031414	0.00327117	-0.01489	0.824175	0.202375	0.870012
		STK32A	NM_145001	0.934975	-1.0563	0.202172	-0.390915	0.433715
		STK32B	NM_018401	1.14864	0.614756	0.104792	0.688543	-0.492678
		STK32C	NM_173575	1.43405	0.127994	-0.298024	0.251829	-0.0610882
		STK33	NM_030906	-0.25565	0.528372	0.410345	0.927176	0.420901
		STK35	NM_080836	-1.79165	-0.686966	-0.739051	-2.03199	-2.99475
		STK36	NM_015690	-1.73402	-0.466073	-1.2181	-0.941723	-0.200716
		STK38	NM_007271	-2.58316	0.0735599	-0.410886	-0.605673	0.756984
		STK38L	NM_015000	-1.37657	0.335913	0.0054723	0.918522	-0.413493
		STK39	NM_013233	0.932637	-0.68365	-0.313258	-0.604784	-0.1592
		STK4	NM_006282	1.73356	0.79787	0.475033	0.713509	0.505696
		STK6	NM_003600	-0.833584	-2.70041	-0.512953	-1.70987	-0.880365
		STYK1	NM_018423	-0.468223	-0.648411	-0.0985872	-0.151876	-0.987471
		SYK	NM_003177	-1.76973	-2.09354	-1.05294	-4.06044	-0.395026
		TAF1	NM_004606	-0.52974	-0.183964	-1.73249	-0.604832	-0.663017
		TAF1L	NM_153809	-0.159514	-0.123457	-0.767296	0.130907	0.442556
		TAO1	NM_004783	-1.42563	-0.138846	0.166714	-0.541179	-0.155628
		TAO1	NM_004783	-0.568244	0.41886	0.319367	-0.521823	0.422155
		TBK1	NM_013254	-0.0411587	-0.303261	0.675914	0.135181	0.69207
		TEC	NM_003215	1.31327	0.406272	0.366392	0.580095	0.496157
		TEK	NM_000459	0.00556885	0.295539	0.196837	0.591023	0.961068
		TESK1	NM_006285	-0.578972	-0.780372	-0.402659	0.106088	0.665556
		TESK2	NM_007170	-2.06491	-1.05514	-1.31584	-0.722285	-0.0199819
		TEX14	NM_031272	-0.472202	-2.54049	-0.803858	-0.885037	0.0644197
		TGFBR1	NM_004612	-1.12294	-0.563504	0.596675	-0.27021	1.10243
		TGFBR2	NM_003242	0.657069	0.21256	0.280009	-0.149073	-1.0027
		THNSL1	NM_024838	0.317505	0.633812	0.617354	0.623201	0.689843
		TIE	NM_005424	1.08175	-0.515615	-0.154936	0.651279	0.327032
		TJP2	NM_004817	-0.0723567	-0.305737	-1.15937	-1.13668	-0.27629
		TK1	NM_003258	-0.966415	-0.628494	-0.921561	-0.546078	-0.328577
		TK2	NM_004614	0.550403	0.127535	0.868699	0.153973	1.2415
		TLK1	NM_012290	-0.443635	-0.0482227	1.24085	0.0114471	1.40995
		TLK2	NM_006852	0.0152784	0.285333	0.620829	0.0456446	2.64394
		TLR1	NM_003263	-0.869968	0.206592	1.10199	-0.01542	1.90746
		TLR3	NM_003265	-0.674366	0.294594	1.01386	-0.00647709	1.26615
		TLR4	NM_003266	-1.46519	-1.07779	-1.29731	-0.824162	0.315695
		TLR6	NM_006068	-0.710976	-0.769459	-0.0396041	-3.46426	-0.189849
		TNFRSF10A	NM_003844	0.539157	0.0926727	1.04871	0.108386	1.06833
		TNIK	XM_039796	-0.0506923	-0.537793	0.0306222	-0.582145	0.261894
		TNK1	NM_003985	0.335571	-0.958334	-0.764238	0.639858	-1.32894
		TNNI3K	NM_015978	0.97396	0.701218	0.627683	0.616125	-0.147539
		TOPK	NM_018492	1.18745	0.439815	1.19244	0.104552	0.865702
		TP53RK	NM_033550	0.0200131	1.0286	0.488236	1.04571	0.69677
		TPK1	NM_022445	-1.99596	-2.20143	0.389277	-1.45982	-1.17186
		TRAD	NM_007064	-0.926807	0.173875	0.476393	-2.49143	-1.91105
		TRIB1	NM_025195	0.582033	0.580544	-1.55517	-0.153715	-0.743898
		TRIB2	NM_021643	-0.861865	0.000456933	0.401081	-1.72387	0.757085
		TRIB3	NM_021158	1.11059	-1.23374	-0.51321	-0.737255	-0.357759
		TRIM	NM_016388	-2.2782	-1.07883	-2.54611	-0.468751	-2.55388
		TRIO	NM_007118	1.19126	1.48102	0.744753	-0.528561	1.23491
		TRPM6	NM_017662	-0.867006	0.1302	1.49446	0.0878751	1.08731
		TRPM7	NM_017672	-1.59519	-1.30796	0.512403	0.0885285	0.514364
		TSKS	NM_021733	-1.32514	-0.382018	0.124094	0.0327077	-0.310001
		TTBK1	XM_166453	-0.392774	-1.35992	-1.45791	0.0143418	1.44452
		TTBK2	NM_173500	-0.419724	-0.771798	0.148346	-0.511098	0.390943
		TTK	NM_003318	-2.00586	-3.65944	-5.50547	-2.06223	-2.21818
		TTN	NM_003319	1.64221	1.07046	0.659456	1.09331	1.2273
		TXK	NM_003328	0.308733	-0.49108	-1.08373	-0.206694	0.0638278
		TXNDC3	NM_016616	0.889024	0.567723	1.14851	0.155071	1.23198
		TYK2	NM_003331	-0.717965	-0.530707	-0.309879	-0.95909	-0.135045
		TYRO3	NM_006293	-0.522033	-0.64773	-0.386311	-0.0281931	-0.730199
		UCK1	NM_031432	-0.828206	-0.266549	-1.19706	-0.129041	0.0472453
		UGP2	NM_006759	-0.127255	0.152177	1.10869	-0.0131682	0.723869
		ULK1	NM_003565	-0.957816	0.304918	0.36424	0.203907	0.38503
		ULK2	NM_014683	-0.978233	0.302324	0.694548	0.241992	-1.35042
		UMP-CMPK	NM_016308	0.636835	0.385053	0.150355	0.046979	-0.638484
		UMPK	NM_012474	0.188813	0.834799	-0.969957	-0.139128	-0.832916
		URKL1	NM_017859	0.617303	-0.075791	-0.242235	-0.43651	0.794822
		VRK1	NM_003384	-0.17743	0.108053	-0.930747	0.366208	0.951546
		VRK2	NM_006296	0.534418	-0.920825	0.0351463	0.177668	1.08625
		VRK3	NM_016440	0.580735	-0.691811	-0.255145	-0.988891	-0.465282
		WEE1	NM_003390	-1.00122	-5.17553	-4.61462	0.079179	-0.0849461
		WIF1	NM_007191	0.0495607	-0.554629	0.169486	-0.311357	0.321992
		XYLB	NM_005108	-1.19947	-0.790884	0.110973	0.348484	-0.202425
		YES1	NM_005433	0.605613	0.201545	0.552843	0.597614	0.463868
		YWHAH	NM_003405	0.0135629	-0.476551	0.229428	0.111732	-0.469115
		YWHAQ	NM_006826	-0.506074	0.157318	-0.387901	-0.710912	0.248671
		ZAK	NM_133646	0.828737	0.755863	1.06127	0.477758	2.19491
		ZAP70	NM_001079	0.669102	-1.40539	0.399238	-0.284921	1.89198
